# Supplementary material for: Who Should Access Closed-Loop Technology? A Qualitative Study of Clinician Attitudes in England
Source: PubMed Central journal article supplement (PMC7196368; doi:10.1089/dia.2019.0380), 2020-04-27
Supplement: Supp_Table_S1.pdf [file Supp_Table_S1.pdf]

SUPPLEMENTARY TABLE S1. THEMATIC ANALYSIS  
CODING FRAMEWORK

| <i>Name of code</i>            | <i>No. of<br/>participants</i> | <i>No. of<br/>references</i> |
|--------------------------------|--------------------------------|------------------------------|
| Access pathway                 |                                |                              |
| Attrition                      | 21                             | 26                           |
| Equity                         | 29                             | 39                           |
| Format                         | 31                             | 107                          |
| Funding                        | 24                             | 51                           |
| NICE guidance                  | 26                             | 58                           |
| Definitions of terms           | 10                             | 13                           |
| Flexibility                    | 22                             | 30                           |
| Gaming                         | 9                              | 15                           |
| Precision                      | 14                             | 25                           |
| Self-funding                   | 21                             | 25                           |
| Stakeholders                   | 10                             | 36                           |
| Clinician characteristics      |                                |                              |
| Profession                     | 36                             | 58                           |
| Levels of type 1 contact       | 22                             | 23                           |
| Tech contact                   | 33                             | 62                           |
| Tech opinions                  | 33                             | 41                           |
| Clinics                        |                                |                              |
| Clinic population              | 20                             | 45                           |
| Information sharing            | 15                             | 16                           |
| Information technology         | 32                             | 38                           |
| Levels of tech usage           | 34                             | 62                           |
| Local challenges               | 5                              | 7                            |
| Management and vision          | 22                             | 26                           |
| Organization                   | 22                             | 30                           |
| Organizational culture         | 33                             | 49                           |
| Professional collaboration     | 26                             | 43                           |
| Resources                      | 31                             | 47                           |
| Technology culture             | 26                             | 65                           |
| Closed loop                    |                                |                              |
| Changes needed for future care | 28                             | 38                           |
| Closed-loop candidacy          | 30                             | 41                           |
| Do-it-yourself closed loop     | 2                              | 4                            |
| Envisaged benefit              | 20                             | 27                           |
| Experience of trials           | 10                             | 11                           |
| Knowledge of closed loop       | 18                             | 19                           |
| Patient limitations            | 22                             | 34                           |
| Views on patients              |                                |                              |
| Adaptability                   | 26                             | 40                           |
| Brand differences              | 17                             | 19                           |
| Candidacy                      | 32                             | 165                          |
| Expectations                   | 17                             | 24                           |
| Predictability                 | 35                             | 63                           |
| Proactivity                    | 32                             | 80                           |

NICE, National Institute for Health and Care Excellence.
